# Supplementary material
Source: publisher site journal article supplement (https://www.dovepress.com/article/460811)

**eTable 1.** Univariate and Multivariate Cox Regression Analysis

|  | **Univariate Cox analysis** | |  | **Multivariate Cox analysis** | |
| --- | --- | --- | --- | --- | --- |
|  | **P Value** | **HR (95% CI)** |  | **P Value** | **HR (95% CI)** |
| Age | * | 1.02 (1.01-1.04) | | 0.523 | 0.99 (0.97-1.01) |
| BMI | 0.378 | 0.97 (0.91-1.04) | |  |  |
| Noninvasive breast cancer |  |  | |  |  |
| No |  | Reference | |  | Reference |
| Yes | ** | 0.14 (0.03-0.55) | | * | 0.14 (0.03-0.62) |
| T stage |  |  | |  |  |
| T2 |  | Reference | |  | Reference |
| T1 | *** | 0.35 (0.21-0.58) | | 0.574 | 0.85 (0.50-1.48) |
| T3 | 0.441 | 1.30 (0.67-2.53) | | 0.727 | 0.88 (0.43-1.81) |
| T4 | 0.997 | 0.00 (0.00 - Inf) | | 98 | 0.00 (0.00 - Inf) |
| Tis | 0.995 | 0.00 (0.00 - Inf) | | 0.996 | 0.00 (0.00 - Inf) |
| T0 | 0.850 | 0.83 (0.11-5.96) | | 0.702 | 0.30 (0.00-133.81) |
| Tx | 0.998 | 0.00 (0.00 - Inf) | | 0.998 | 0.00 (0.00 - Inf) |
| N stage |  |  | |  |  |
| N3 |  | Reference | |  | Reference |
| N0 | *** | 0.13 (0.08-0.22) | | *** | 0.29 (0.16-0.50) |
| N1 | *** | 0.20 (0.11-0.37) | | * | 0.46 (0.24-0.87) |
| N2 | * | 0.48 (0.27-0.86) | | 0.710 | 0.89 (0.47-1.66) |
| Nx | 0.076 | 6.13 (0.83-45.54) | | 0.242 | 38.09 (0.09-16908.72) |
| M stage |  |  | |  |  |
| M0 |  | Reference | |  | Reference |
| M1 | *** | 12.06 (5.25-27.71) | | ** | 4.78 (1.80-12.72) |
| Mx | 0.192 | 3.72 (0.52-26.76) | | 0.058 | 8.10 (0.93-70.45) |
| Axillary lymph node dissection |  |  | |  |  |
| No |  | Reference | |  | Reference |
| Yes | *** | 0.02 (0.00-0.16) | | * | 0.08 (0.01-0.57) |
| Wound dehiscence, infection or nonhealing |  |  | |  |  |
| No |  | Reference | |  | Reference |
| Yes | * | 3.11 (1.14-8.50) | | *** | 8.31 (2.78-24.86) |
| Chemotherapy |  |  | |  |  |
| No |  | Reference | |  |  |
| Yes | 0.339 | 1.29 (0.77-2.15) | |  |  |
| Radiation therapy |  |  | |  |  |
| No |  | Reference | |  |  |
| Yes | 0.350 | 1.31 (0.74-2.32) | |  |  |
| Endocrine therapy |  |  | |  |  |
| Yes |  | Reference | |  | Reference |
| No | *** | 0.05 (0.02-0.14) | | *** | 0.09 (0.03-0.28) |
| Targeted therapy |  |  | |  |  |
| Yes |  | Reference | |  |  |
| No | 0.087 | 0.49 (0.21-1.11) | |  |  |
| Preoperative light diet |  |  | |  |  |
| Yes |  | Reference | |  | Reference |
| No | ** | 0.53 (0.35-0.80) | | 0.167 | 0.73 (0.46-1.14) |
| Wound drain placement |  |  | |  |  |
| No |  | Reference | |  | Reference |
| Yes | * | 3.20 (1.29-7.95) | | ** | 4.97 (1.85-13.32) |
| Ports |  |  | |  |  |
| No |  | Reference | |  | Reference |
| Yes | *** | 0.46 (0.29-0.72) | | *** | 0.36 (0.22-0.59) |
| PICCs |  |  | |  |  |
| No |  | Reference | |  |  |
| Yes | 0.274 | 1.27 (0.83-1.95) | |  |  |
| Functional exercise of affected limb |  |  | |  |  |
| Occasionally |  | Reference | |  | Reference |
| Everyday | *** | 3.26 (2.14-4.95) | | 0.051 | 1.58 (1.00-2.50) |
| Never | 0.061 | 2.67 (0.96-7.48) | | * | 3.07 (1.05-9.03) |
| Postoperative sex life |  |  | |  |  |
| No |  | Reference | |  | Reference |
| Yes | *** | 0.02 (0.01-0.09) | | *** | 0.08 (0.02-0.35) |
| Pain of the disease |  |  | |  |  |
| Yes |  | Reference | |  | Reference |
| No | *** | 0.37 (0.21-0.64) | | * | 0.45 (0.25-0.83) |
| Hairpiece |  |  | |  |  |
| No |  | Reference | |  | Reference |
| Yes | * | 0.54 (0.32-0.91) | | 0.151 | 0.66 (0.38-1.16) |
| Prosthetic breast |  |  | |  |  |
| No |  | Reference | |  | Reference |
| Yes | *** | 0.07 (0.02-0.18) | | * | 0.31 (0.11-0.87) |
| Light makeup |  |  | |  |  |
| No |  | Reference | |  |  |
| Yes | 0.307 | 2.80 (0.39-20.10) | |  |  |

* P < 0.05, ** P < 0.01, *** P < 0.001. In the 95% confidence interval (CI) for the hazard ratio (HR), 'Inf' indicates that the upper limit of the interval is infinite. This suggests that the effect of the variable is considered highly significant in the statistical analysis.

**eTable 2.** Table Hyperparameters

| Model | Hyperparameters |  |  |  |
| --- | --- | --- | --- | --- |
| XGB | nrounds：500 | max_depth：6 | eta：0.01 | gamma：0 |
|  | colsample_bytree：1 | min_child_weight：1 | subsample：0.05 |  |
| SVM | sigma：0.01 | C：0.2 |  |  |
| Ridge | alpha：0 | lambda:10 |  |  |
| KNN | k：50 |  |  |  |
| NNet | size：1 | decay:100 |  |  |
| RF | mtry：1 | splitrule：extratrees | min.node.size：600 |  |

eFigure1 Study flow chart


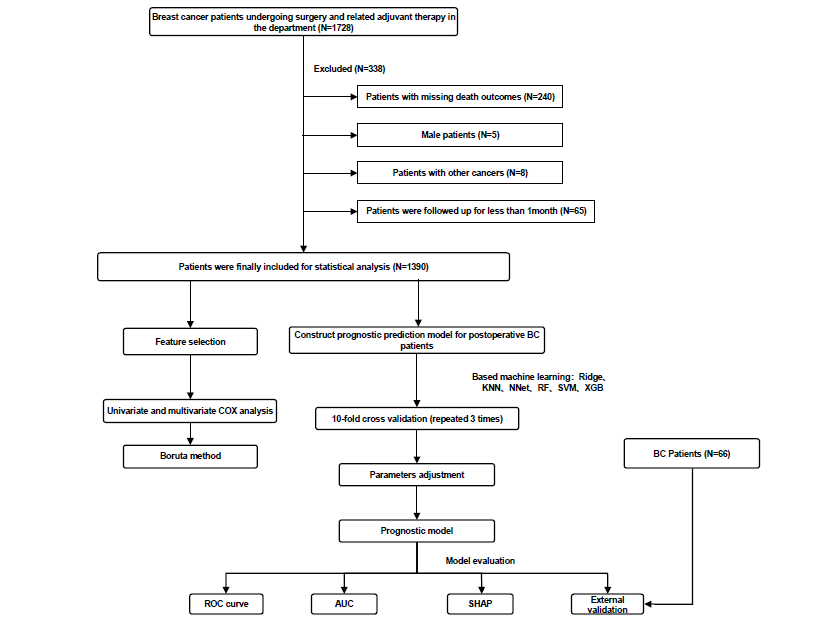


eFigure 2 Feature selection by the Boruta algorithm


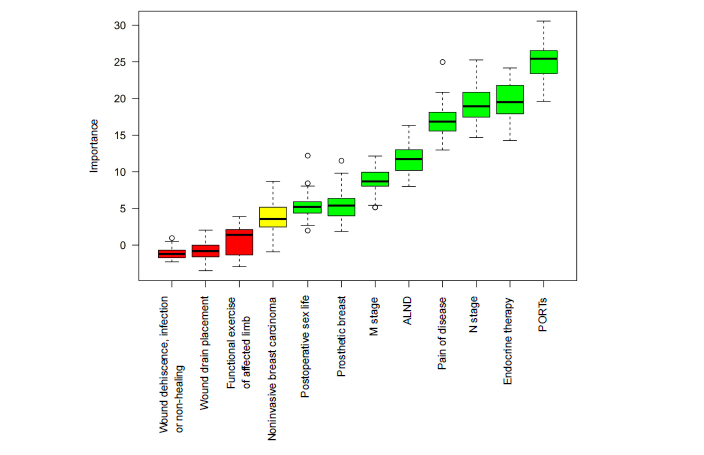


eFigure 3 Screenshot of web app


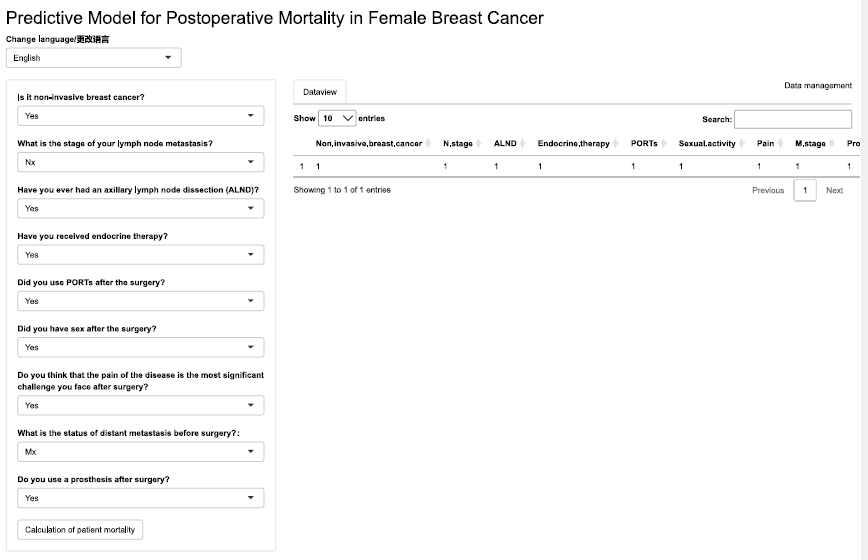

Supplement: Supplementary file 1 [file get_supplementary_file.php]
